# Supplementary material
Source: MDPI journal article supplement (https://www.mdpi.com/2311-7524/8/12/1213)
Supplement: s1 [file s1]

# Correlations between the phylogenetic relationship of 14 *Tulasnella* strains and their promotion effect on *Dendrobium crepidatum* protocorm

Jiayi Zhao, Zhenjian Li, Siyu Wang, Fu Yang, Lubin Li, Lei Liu\*

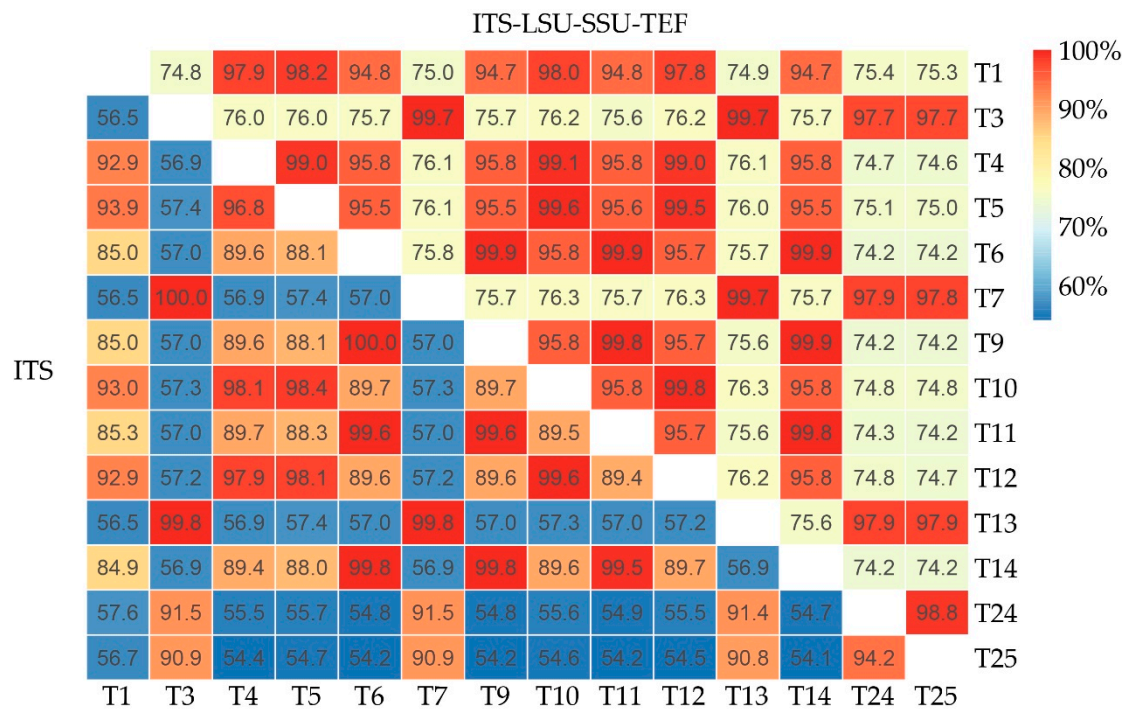

**Figure S1.** Sequence consistency across different strains. The ITS sequence identity (%) (lower left) and ITS-LSU-SSU-TEF combined sequences identity (%) (upper right)

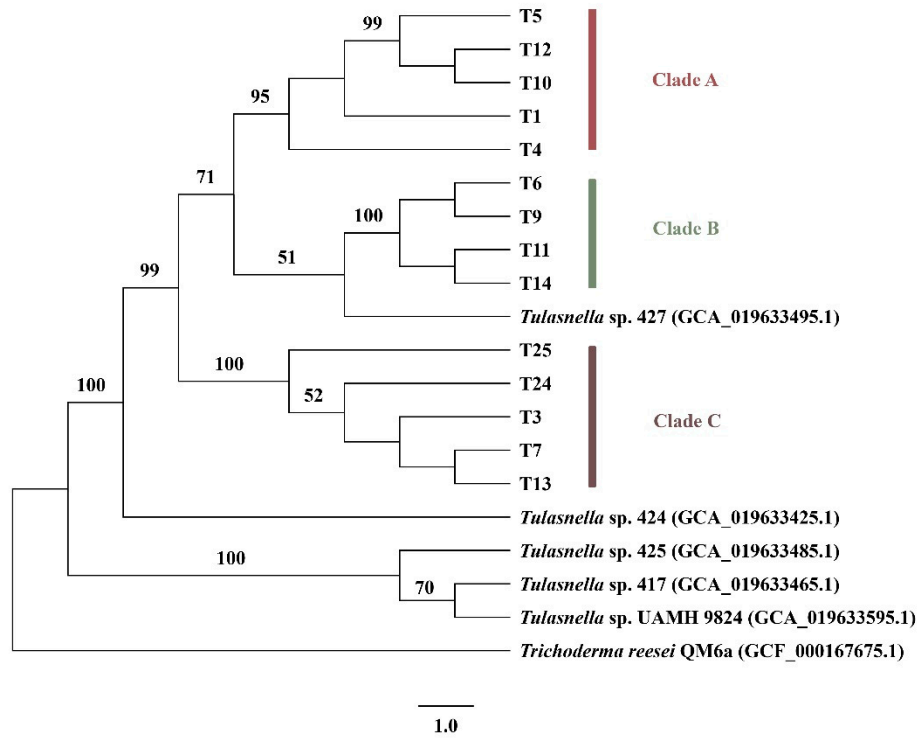

**Figure S2.** Maximum likelihood trees of ITS-LSU-SSU-TEF concatenated sequences of *Tulasnella* sp. The genome sequences of *Trichoderma reesei* was used as an outgroup. Only bootstrap values (based on 1000 replications)  $\geq 50$  is shown. Scale, 1.0 nt substitutions per site.

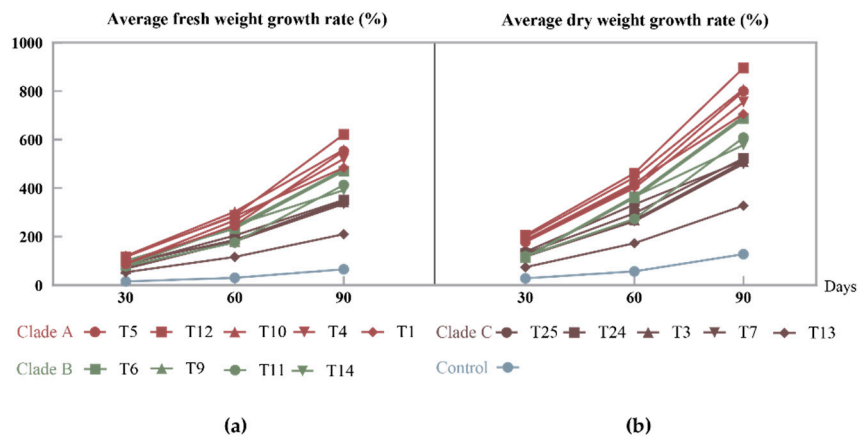

**Figure S3.** Average fresh weight growth rate and dry weight growth rate of symbionts on Days 30, 60 and 90 of symbiosis. (a) Variation trend of average fresh weight growth rate on the 30, 60 and 90th days of symbiosis. (b) Variation trend of average dry weight growth rate on the 30, 60 and 90th days of symbiosis.

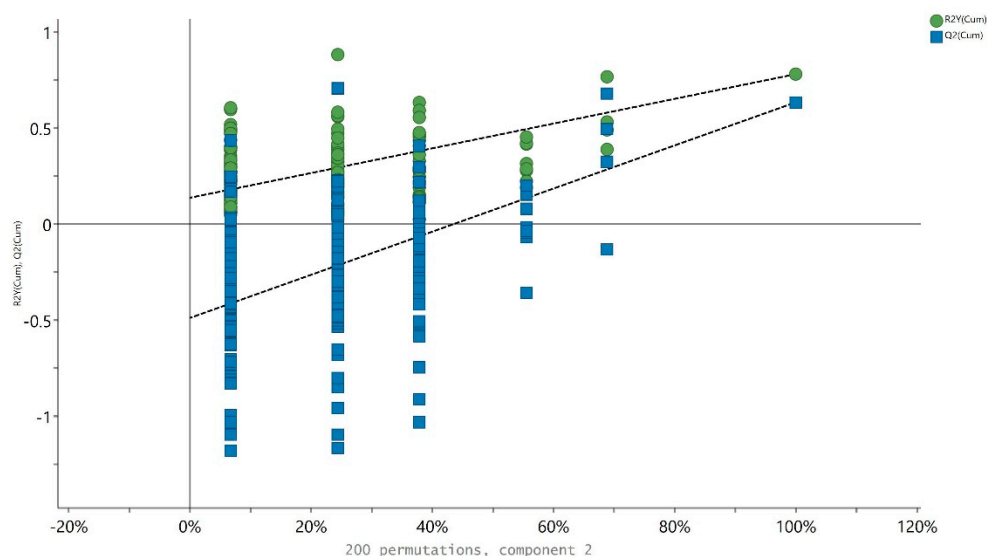

**Figure S4.** 200 permutation tests of the OPLS-DA model.

**Table S1.** Primer sequence

| Gene name                                | Primer name  | 5'-3'                  |
|------------------------------------------|--------------|------------------------|
| small ribosomal subunit                  | SSU- Forward | CGCGGTAATTCCAGCTCCACGA |
| small ribosomal subunit                  | SSU- Reverse | GGGCGGTGTGTACAAAGGGCA  |
| translation elongation factor 1 $\alpha$ | TEF- Forward | CACGCCCTTCTTGCCTTCACC  |
| translation elongation factor 1 $\alpha$ | TEF- Reverse | TGTCACGGACGGCGAAACGAC  |

**Table S2** Blast results of mycorrhizal fungi ITS sequences in the GenBank database

| Isolate No. | Blast result of ITS sequence                          | Accession No. | Similarity (%) | Coverage (%) |
|-------------|-------------------------------------------------------|---------------|----------------|--------------|
| T1          | <i>Tulasnella</i> sp. clone DP4                       | MK239045.1    | 99             | 100          |
| T3          | Uncultured <i>Tulasnella</i> clone 5-12-6             | HM230648.1    | 99.84          | 99           |
| T4          | <i>Tulasnella calospora</i> isolate Pv-PC-1-1         | GU166421.1    | 99.2           | 99           |
| T5          | <i>Tulasnella calospora</i> strain TG1                | MN607233.1    | 99.35          | 99           |
| T6          | <i>Tulasnella calospora</i> isolate Chunxin-25 CG15X3 | EF393631      | 99             | 99.52        |
| T7          | Uncultured <i>Tulasnella</i> clone 5-12-6             | HM230648.1    | 99.84          | 99           |
| T9          | <i>Tulasnella calospora</i> isolate Chunxin-25 CG15X3 | EF393631      | 99             | 99.52        |

|     |                                                          |            |       |       |
|-----|----------------------------------------------------------|------------|-------|-------|
| T10 | Uncultured <i>Tulasnella</i> clone<br>9tu-9              | HM230649.1 | 99.05 | 99    |
| T11 | <i>Tulasnella calospora</i> isolate<br>Chunxin-25 CG15X3 | EF393631.1 | 99.68 | 99    |
| T12 | Uncultured <i>Tulasnella</i> clone<br>9tu-9              | HM230649.1 | 99.21 | 99    |
| T13 | Uncultured <i>Tulasnella</i> clone<br>5-12-6             | HM230648.1 | 99.67 | 99    |
| T14 | <i>Tulasnella calospora</i> isolate<br>Chunxin-25 CG15X3 | EF393631   | 99    | 99.52 |
| T24 | Uncultured <i>Tulasnella</i> clone<br>5-12-6             | HM230648.1 | 98.08 | 97    |
| T25 | Uncultured <i>Tulasnella</i> clone<br>5-12-6             | HM230648.1 | 96.89 | 97    |

**Table S3.** The average fresh weight growth rate of protocorms on Days 30, 60 and 90 of symbiosis.

| Isolate | 30 days                   | 60 days                     | 90 days                     |
|---------|---------------------------|-----------------------------|-----------------------------|
| T1      | 120.67±5.03% <sup>a</sup> | 285.02±13.53% <sup>b</sup>  | 484.55±9.52% <sup>d</sup>   |
| T3      | 67.02±5.01% <sup>d</sup>  | 180.67±9.02% <sup>f</sup>   | 342.72±19.07% <sup>f</sup>  |
| T4      | 88.33±7.10% <sup>c</sup>  | 267.02±11.53% <sup>c</sup>  | 520.44±19.54% <sup>c</sup>  |
| T5      | 88.67±8.08% <sup>c</sup>  | 246.01±8.54% <sup>d</sup>   | 552.94±19.26% <sup>bc</sup> |
| T6      | 101.02±4.58% <sup>b</sup> | 233.02±9.54% <sup>d</sup>   | 470.82±22.17% <sup>d</sup>  |
| T7      | 71.01±5.02% <sup>d</sup>  | 181.67±10.41% <sup>f</sup>  | 335.38±23.37% <sup>f</sup>  |
| T9      | 81.67±5.51% <sup>cd</sup> | 242.01±10.02% <sup>d</sup>  | 478.03±20.82% <sup>d</sup>  |
| T10     | 120.67±8.51% <sup>a</sup> | 303.03±8.54% <sup>a</sup>   | 559.07±19.35% <sup>b</sup>  |
| T11     | 78.67±5.03% <sup>cd</sup> | 176.01±10.54% <sup>f</sup>  | 413.60±20.60% <sup>e</sup>  |
| T12     | 116.67±7.02% <sup>a</sup> | 288.02±7.55% <sup>ab</sup>  | 622.16±19.06% <sup>a</sup>  |
| T13     | 54.01±4.58% <sup>e</sup>  | 116.33±8.08% <sup>g</sup>   | 210.28±18.78% <sup>g</sup>  |
| T14     | 79.67±4.93% <sup>cd</sup> | 247.67±11.72% <sup>cd</sup> | 392.08±17.79% <sup>e</sup>  |
| T24     | 83.67±9.61% <sup>c</sup>  | 205.01±8.02% <sup>e</sup>   | 351.85±20.34% <sup>f</sup>  |
| T25     | 88.33±8.02% <sup>c</sup>  | 187.02±8.54% <sup>f</sup>   | 345.79±17.44% <sup>f</sup>  |
| Control | 15.33±5.51% <sup>f</sup>  | 30.67±5.03% <sup>h</sup>    | 65.26±28.74% <sup>h</sup>   |

**Table S4.** Average dry weight growth rate of protocorms on Days 30, 60 and 90 of symbiosis.

| Isolate | 30 days                     | 60 days                    | 90 days                     |
|---------|-----------------------------|----------------------------|-----------------------------|
| T1      | 186.67±8.08% <sup>b</sup>   | 421.02±9.64% <sup>b</sup>  | 705.70±13.11% <sup>d</sup>  |
| T3      | 117.67±5.86% <sup>cd</sup>  | 268.67±12.90% <sup>f</sup> | 510.21±26.28% <sup>f</sup>  |
| T4      | 177.33±11.59% <sup>b</sup>  | 401.02±16.09% <sup>b</sup> | 755.16±26.93% <sup>c</sup>  |
| T5      | 179.01±12.12% <sup>b</sup>  | 411.03±14.73% <sup>b</sup> | 799.96±26.55% <sup>bc</sup> |
| T6      | 114.33±12.58% <sup>cd</sup> | 360.01±14.80% <sup>c</sup> | 686.77±30.55% <sup>d</sup>  |
| T7      | 119.01±8.02% <sup>cd</sup>  | 263.67±13.01% <sup>f</sup> | 500.09±32.21% <sup>f</sup>  |

|         |                             |                            |                            |
|---------|-----------------------------|----------------------------|----------------------------|
| T9      | 115.67±11.68% <sup>cd</sup> | 368.02±10.58% <sup>c</sup> | 696.72±28.68% <sup>d</sup> |
| T10     | 198.00±11.53% <sup>ab</sup> | 445.01±12.53% <sup>a</sup> | 808.41±26.67% <sup>b</sup> |
| T11     | 119.67±10.69% <sup>d</sup>  | 273.03±12.49% <sup>f</sup> | 607.91±28.39% <sup>e</sup> |
| T12     | 206.00±10.15% <sup>a</sup>  | 462.67±13.32% <sup>a</sup> | 895.37±26.27% <sup>a</sup> |
| T13     | 74.33±8.62% <sup>e</sup>    | 173.02±11.53% <sup>g</sup> | 327.67±25.88% <sup>g</sup> |
| T14     | 115.01±10.54% <sup>cd</sup> | 365.67±10.50% <sup>c</sup> | 578.25±24.52% <sup>e</sup> |
| T24     | 130.02±11.14% <sup>cd</sup> | 297.00±15.40% <sup>e</sup> | 522.80±28.03% <sup>f</sup> |
| T25     | 137.33±4.73% <sup>c</sup>   | 332.67±14.57% <sup>d</sup> | 514.44±24.03% <sup>f</sup> |
| Control | 28.33±4.73% <sup>f</sup>    | 57.01±7.94% <sup>h</sup>   | 127.79±39.62% <sup>h</sup> |

---

**Table S5.** Average growth parameters of protocorms on Day 90 of symbiosis.

| Isolate | Average plant height<br>(mm) | Average stem<br>diameter (mm) | Average root length<br>(mm) | Average root number     | Relative leaf area<br>(mm <sup>2</sup> ) | Average leaf number     |
|---------|------------------------------|-------------------------------|-----------------------------|-------------------------|------------------------------------------|-------------------------|
| T1      | 7.87±0.32 <sup>b</sup>       | 2.13±0.19 <sup>b</sup>        | 9.10±0.76 <sup>c</sup>      | 1.78±0.19 <sup>bc</sup> | 4.72±0.43 <sup>bc</sup>                  | 4.00±0.00 <sup>bc</sup> |
| T3      | 6.47±0.35 <sup>d</sup>       | 1.90±0.09 <sup>c</sup>        | 3.20±0.49 <sup>g</sup>      | 1.22±0.19 <sup>d</sup>  | 2.33±0.27 <sup>ef</sup>                  | 3.67±0.33 <sup>cd</sup> |
| T4      | 7.96±0.39 <sup>b</sup>       | 2.26±0.04 <sup>ab</sup>       | 9.41±0.37 <sup>c</sup>      | 1.89±0.19 <sup>b</sup>  | 5.37±0.49 <sup>b</sup>                   | 4.00±0.00 <sup>bc</sup> |
| T5      | 8.50±0.27 <sup>a</sup>       | 2.35±0.05 <sup>ab</sup>       | 8.97±0.67 <sup>c</sup>      | 1.56±0.19 <sup>c</sup>  | 4.47±0.37 <sup>c</sup>                   | 4.33±0.00 <sup>b</sup>  |
| T6      | 7.13±0.15 <sup>c</sup>       | 2.09±0.17 <sup>bc</sup>       | 5.10±0.63 <sup>ef</sup>     | 1.22±0.19 <sup>d</sup>  | 4.21±0.23 <sup>cd</sup>                  | 4.00±0.33 <sup>bc</sup> |
| T7      | 6.23±0.31 <sup>d</sup>       | 1.90±0.10 <sup>c</sup>        | 3.70±0.45 <sup>g</sup>      | 1.22±0.19 <sup>d</sup>  | 2.00±0.35 <sup>f</sup>                   | 3.67±0.00 <sup>cd</sup> |
| T9      | 7.12±0.29 <sup>c</sup>       | 2.01±0.12 <sup>bc</sup>       | 5.72±0.51 <sup>e</sup>      | 1.44±0.19 <sup>cd</sup> | 4.40±0.27 <sup>c</sup>                   | 4.00±0.00 <sup>bc</sup> |
| T10     | 8.52±0.37 <sup>a</sup>       | 2.35±0.11 <sup>ab</sup>       | 11.34±0.72 <sup>b</sup>     | 2.11±0.19 <sup>ab</sup> | 7.48±0.74 <sup>a</sup>                   | 4.67±0.33 <sup>ab</sup> |
| T11     | 7.81±0.27 <sup>b</sup>       | 2.11±0.09 <sup>bc</sup>       | 5.19±0.65 <sup>ef</sup>     | 1.22±0.19 <sup>d</sup>  | 3.67±0.14 <sup>d</sup>                   | 4.00±0.00 <sup>bc</sup> |
| T12     | 8.68±0.16 <sup>a</sup>       | 2.39±0.05 <sup>a</sup>        | 15.14±0.46 <sup>a</sup>     | 2.22±0.19 <sup>a</sup>  | 7.26±0.72 <sup>a</sup>                   | 5.00±0.33 <sup>a</sup>  |
| T13     | 5.55±0.37 <sup>e</sup>       | 1.89±0.04 <sup>e</sup>        | 2.97±0.28 <sup>g</sup>      | 0.89±0.19 <sup>e</sup>  | 2.45±0.16 <sup>f</sup>                   | 3.33±0.33 <sup>d</sup>  |
| T14     | 7.80±0.26 <sup>b</sup>       | 2.09±0.16 <sup>bc</sup>       | 7.16±0.73 <sup>d</sup>      | 1.44±0.19 <sup>cd</sup> | 3.52±0.40 <sup>de</sup>                  | 4.00±0.00 <sup>bc</sup> |
| T24     | 7.09±0.57 <sup>c</sup>       | 2.01±0.09 <sup>bc</sup>       | 4.07±0.42 <sup>fg</sup>     | 0.89±0.19 <sup>e</sup>  | 2.52±0.27 <sup>ef</sup>                  | 3.89±0.38 <sup>c</sup>  |
| T25     | 6.67±0.21 <sup>cd</sup>      | 2.00±0.11 <sup>bc</sup>       | 4.73±0.62 <sup>f</sup>      | 0.89±0.19 <sup>e</sup>  | 2.98±0.25 <sup>e</sup>                   | 3.67±0.33 <sup>cd</sup> |
| Control | 4.76±0.37 <sup>f</sup>       | 1.58±0.06 <sup>d</sup>        | 1.98±0.35 <sup>h</sup>      | 0.56±0.19 <sup>h</sup>  | 2.01±0.21 <sup>f</sup>                   | 2.67±0.33 <sup>e</sup>  |
